# Supplementary material for: Photodissociation of permanganate (MnO4−) produces the manganese dioxide anion (MnO2−) in an excited triplet state
Source: Royal Society of Chemistry journal article supplement (doi:10.1039/d3cp04576e), 2023-01-01
Supplement: d3cp04576e1.pdf [file d3cp04576e1.pdf]

## Supplementary information: Photodissociation of permanganate ( $\text{MnO}_4^-$ ) produces the manganese dioxide anion ( $\text{MnO}_2^-$ ) in an excited triplet state

Jemma A. Gibbard,\* Jonathan Reppel and Jan R. R. Verlet

Email: [jemma.gibbard@durham.ac.uk](mailto:jemma.gibbard@durham.ac.uk)

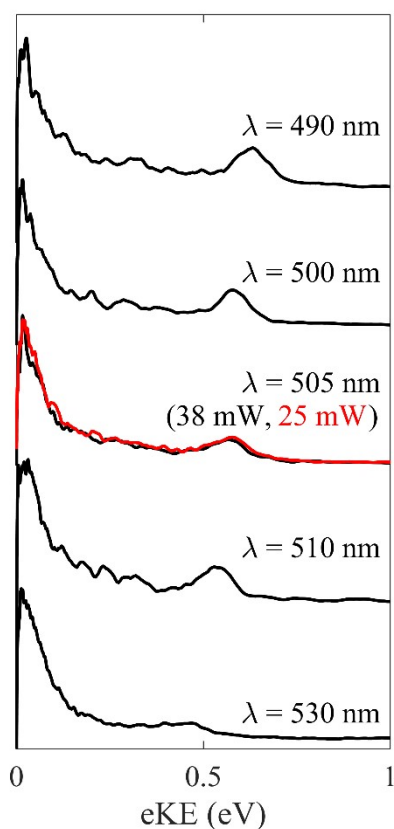

Figure S11: Photoelectron spectra recorded at  $\lambda = 490$  nm (2.53 eV), 500 nm (2.48 eV), 505 nm (2.46 eV), 510 nm (2.43 eV), and 530 nm (2.34 eV), with two laser fluences reported for  $\lambda = 505$  nm.
